# Supplementary material for: Proteomic analysis of endogenous nitrotryptophan-containing proteins in rat hippocampus and cerebellum
Source: PubMed Central journal article supplement — Biosci Rep. 2012 Sep 14;32(6):521–30. doi: 10.1042/BSR20120032 (PMC3475453; doi:10.1042/bsr20120032), 2012-09-14
Supplement: bsr0320521add.pdf [file bsr0320521add.pdf]

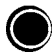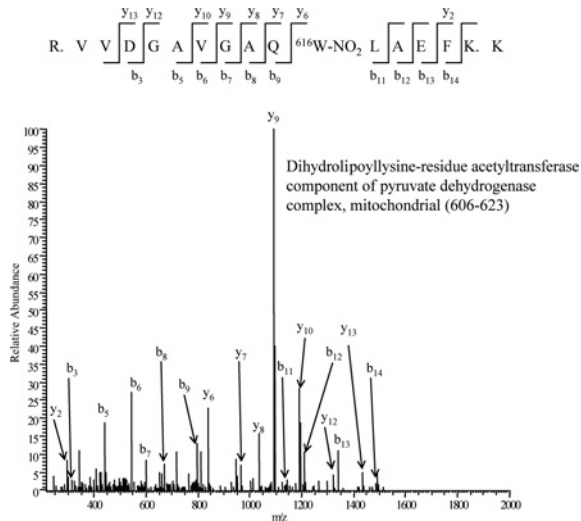

**Figure S5 MS/MS spectrum of the tryptic peptide R<sup>606</sup>.VVDGAVGAQ<sup>616</sup>W-NO<sub>2</sub>LAEFKK.Y<sup>623</sup> from PDEC2, mitochondrial in the hippocampus**  
W-NO<sub>2</sub> indicates the NO<sub>2</sub>Trp residue.

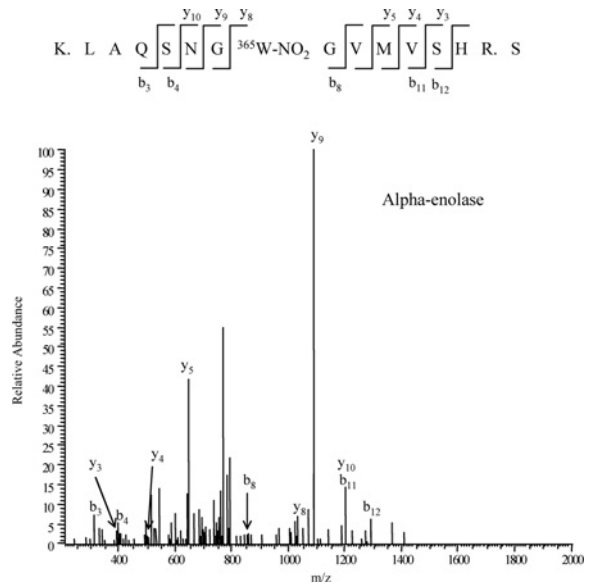

**Figure S7 MS/MS spectrum of the tryptic peptide K<sup>358</sup>.LAQSNQ<sup>365</sup>W-NO<sub>2</sub>GVMVSHR.S<sup>373</sup> from  $\alpha$ -enolase in the hippocampus**  
W-NO<sub>2</sub> indicates the NO<sub>2</sub>Trp residue.

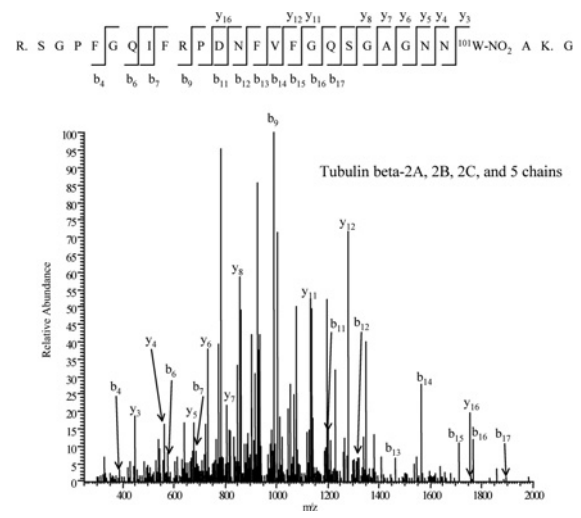

**Figure S6 MS/MS spectrum of the tryptic peptide R<sup>77</sup>.SGPFQIFRPDNFVFGQSGAGNN<sup>101</sup>W-NO<sub>2</sub>AK.G<sup>104</sup> from tubulin  $\beta$ -2A, 2B, 2C and 5 chains in the hippocampus**  
W-NO<sub>2</sub> indicates the NO<sub>2</sub>Trp residue.

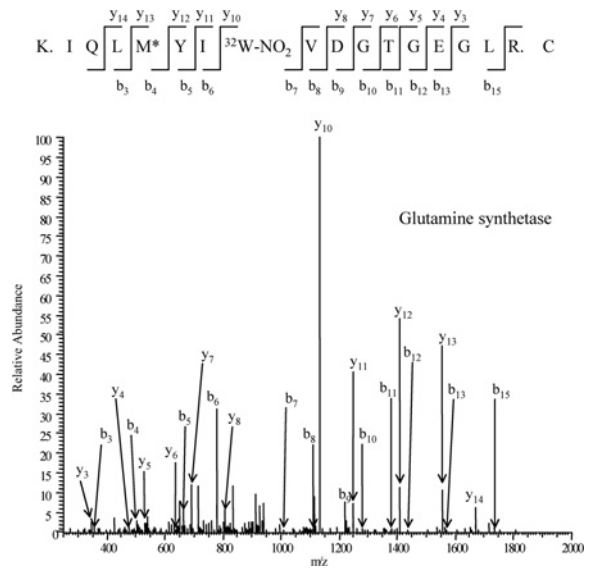

**Figure S8 MS/MS spectrum of the tryptic peptide K<sup>45</sup>.IQLMYI<sup>32</sup>W-NO<sub>2</sub>VDGTGEGRLR.C<sup>42</sup> from glutamine synthetase in the hippocampus**  
W-NO<sub>2</sub> indicates the NO<sub>2</sub>Trp residue. M\* indicates oxidation of methionine residue.

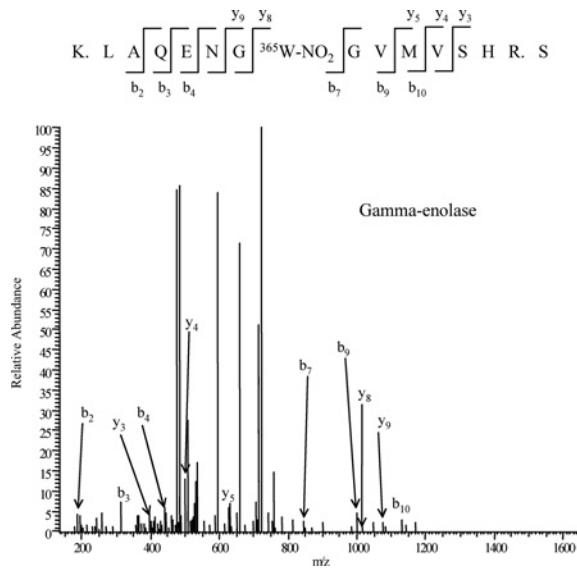

**Figure S9 MS/MS spectrum of the tryptic peptide K<sup>358</sup>.LAQENG<sup>365</sup>W-NO<sub>2</sub>GVMVSHR.S<sup>373</sup> from  $\gamma$ -enolase in the hippocampus**

W-NO<sub>2</sub> indicates the NO<sub>2</sub>Trp residue.

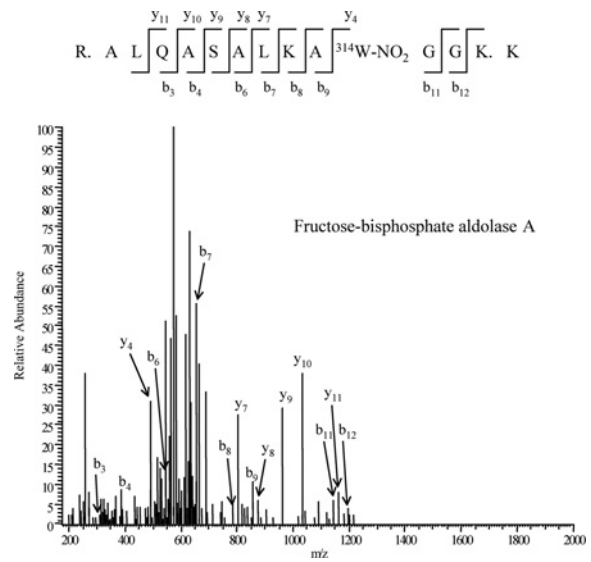

**Figure S11 MS/MS spectrum of the tryptic peptide R<sup>304</sup>.ALQASALKA<sup>314</sup>W-NO<sub>2</sub>GGK.K<sup>318</sup> from fructose-bisphosphate aldolase A in the hippocampus**

W-NO<sub>2</sub> indicates the NO<sub>2</sub>Trp residue.

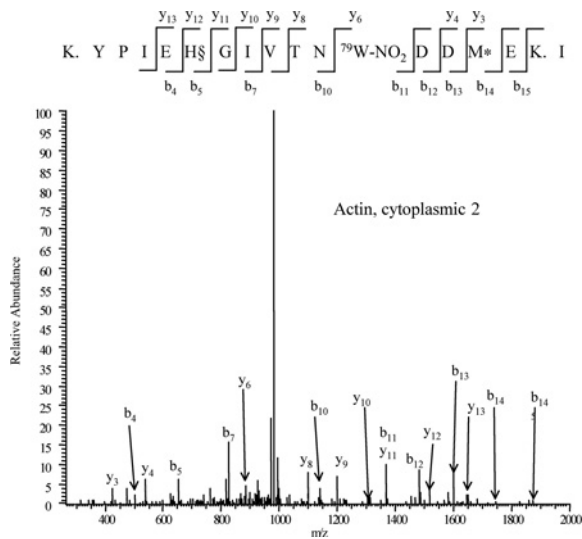

**Figure S10 MS/MS spectrum of the tryptic peptide K<sup>68</sup>.YPIEHGIVTN<sup>79</sup>W-NO<sub>2</sub>DDMEK.I<sup>85</sup> from actin, cytoplasmic 2 in the hippocampus**

W-NO<sub>2</sub> indicates the NO<sub>2</sub>Trp residue. H $\delta$  indicates the methylation of the histidine residue. M\* indicates oxidation of the methionine residue.

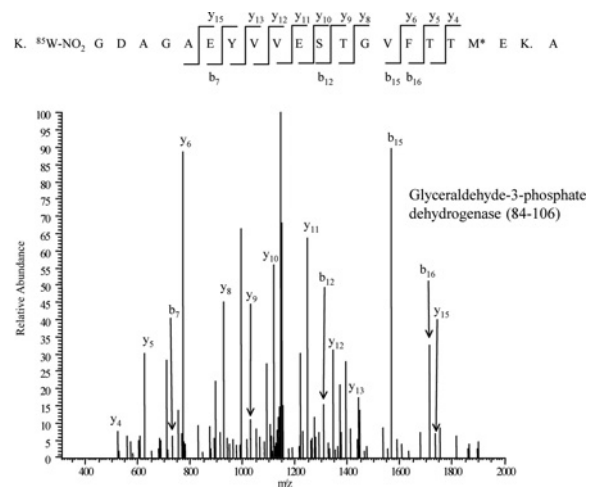

**Figure S12 MS/MS spectrum of the tryptic peptide K<sup>84</sup>.W<sup>85</sup>-NO<sub>2</sub>GDAGAEYVVESTGVFTTMEK.A<sup>106</sup> from GAPDH in the hippocampus**

W-NO<sub>2</sub> indicates the NO<sub>2</sub>Trp residue. M\* indicates oxidation of methionine residue.



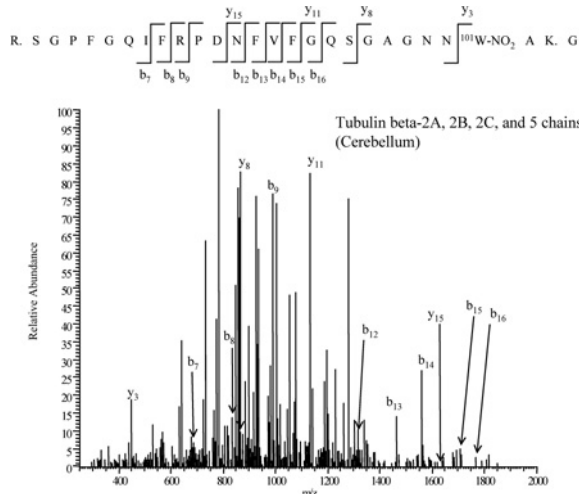

**Figure S17 MS/MS spectrum of the tryptic peptide R<sup>77</sup>.SGPFQIFRPDNFVFGQSGAGNN<sup>101</sup>W-NO<sub>2</sub>AK.G<sup>104</sup> from tubulin  $\beta$ -2A, -2B, -2C and -5 chains in the cerebellum**

W-NO<sub>2</sub> indicates the NO<sub>2</sub>Trp residue.

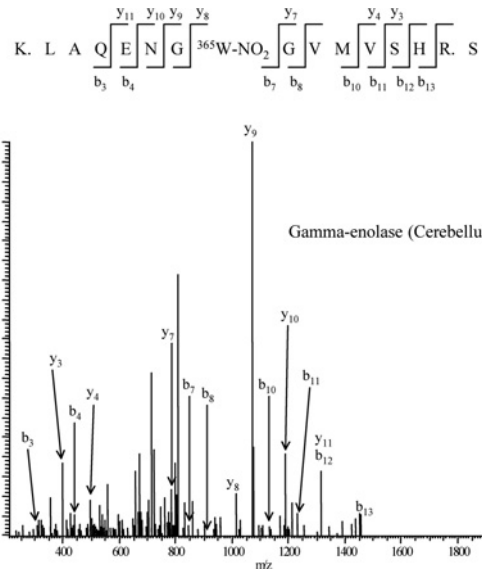

**Figure S19 MS/MS spectrum of the tryptic peptide K<sup>358</sup>.LAQENG<sup>365</sup>W-NO<sub>2</sub>GVMVSHR.S<sup>373</sup> from  $\gamma$ -enolase in the cerebellum**

W-NO<sub>2</sub> indicates the NO<sub>2</sub>Trp residue.

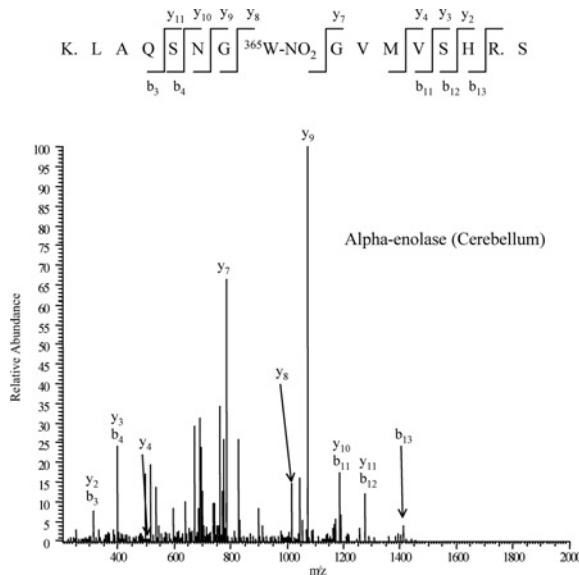

**Figure S18 MS/MS spectrum of the tryptic peptide K<sup>358</sup>.LAQSN<sup>365</sup>W-NO<sub>2</sub>GVMVSHR.S<sup>373</sup> from  $\alpha$ -enolase in the cerebellum**

W-NO<sub>2</sub> indicates the NO<sub>2</sub>Trp residue.

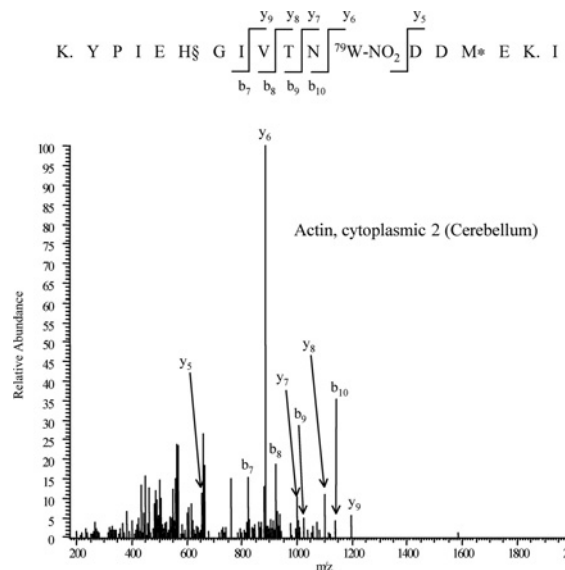

**Figure S20 MS/MS spectrum of the tryptic peptide K<sup>68</sup>.YPIEHGIVTN<sup>79</sup>W-NO<sub>2</sub>DDMEK.I<sup>85</sup> from actin cytoplasmic 2 in the cerebellum**

W-NO<sub>2</sub> indicates the NO<sub>2</sub>Trp residue. H§ indicates the methylation of the histidine residue. M\* indicates the oxidation of the methionine residue.
